# Supplementary material for: Lenvatinib as an Initial Treatment in Patients with Intermediate-stage Hepatocellular Carcinoma Beyond up-to-seven Criteria and Child-Pugh A Liver Function: A Proof-of-Concept Study
Source: Preprints.org preprint supplement (doi:10.20944/preprints201906.0285.v1), 2019-06-27
Supplement: Supplementary file 1 [file supplementary]

# Supplementary Figure.1 ALBI score over time in patients with ALBI grade 1 treated by Lenvatinib (n=19) or TACE (n=37) (propensity score matched results)

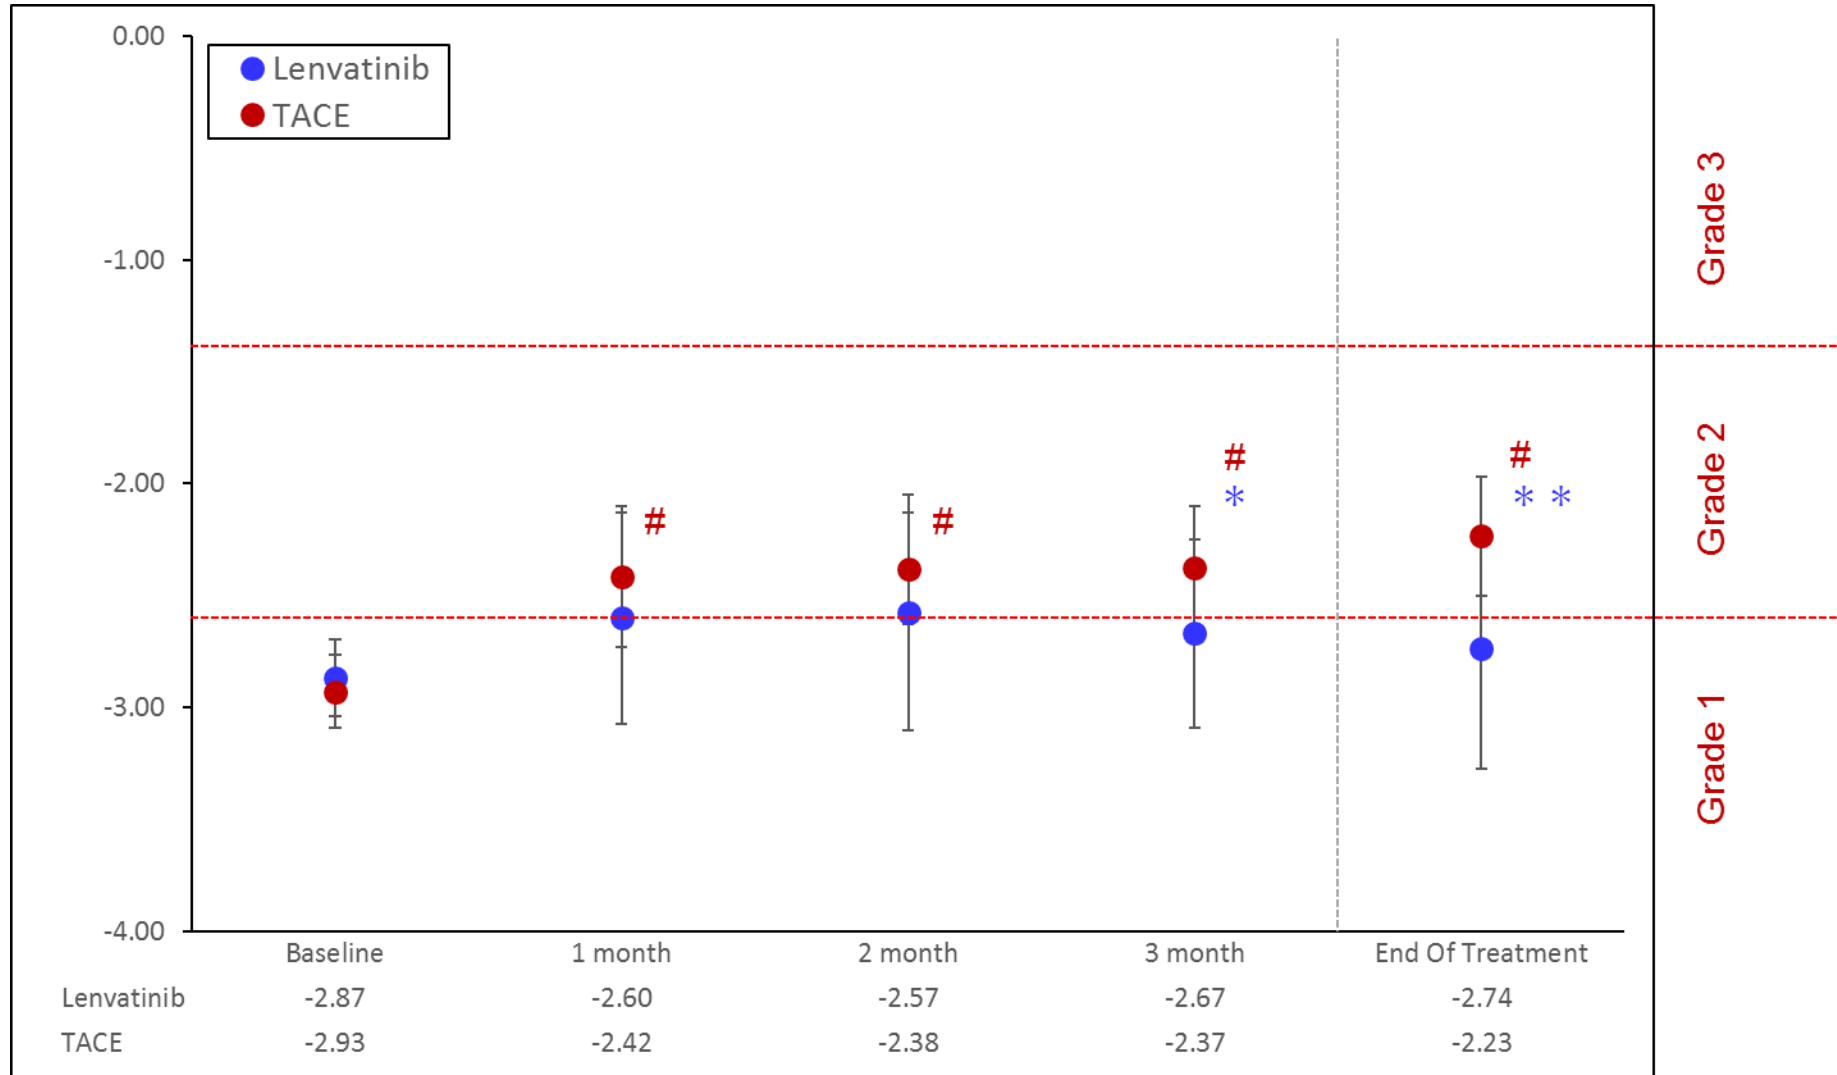

\* p<0.05 (Lenvatinib vs. TACE)  
\*\* p<0.01 (Lenvatinib vs. TACE)  
# p<0.01 (vs. TACE at baseline)

# Supplementary Figure.2 Progression Free Survival (ALBI grade 1; propensity score matched)

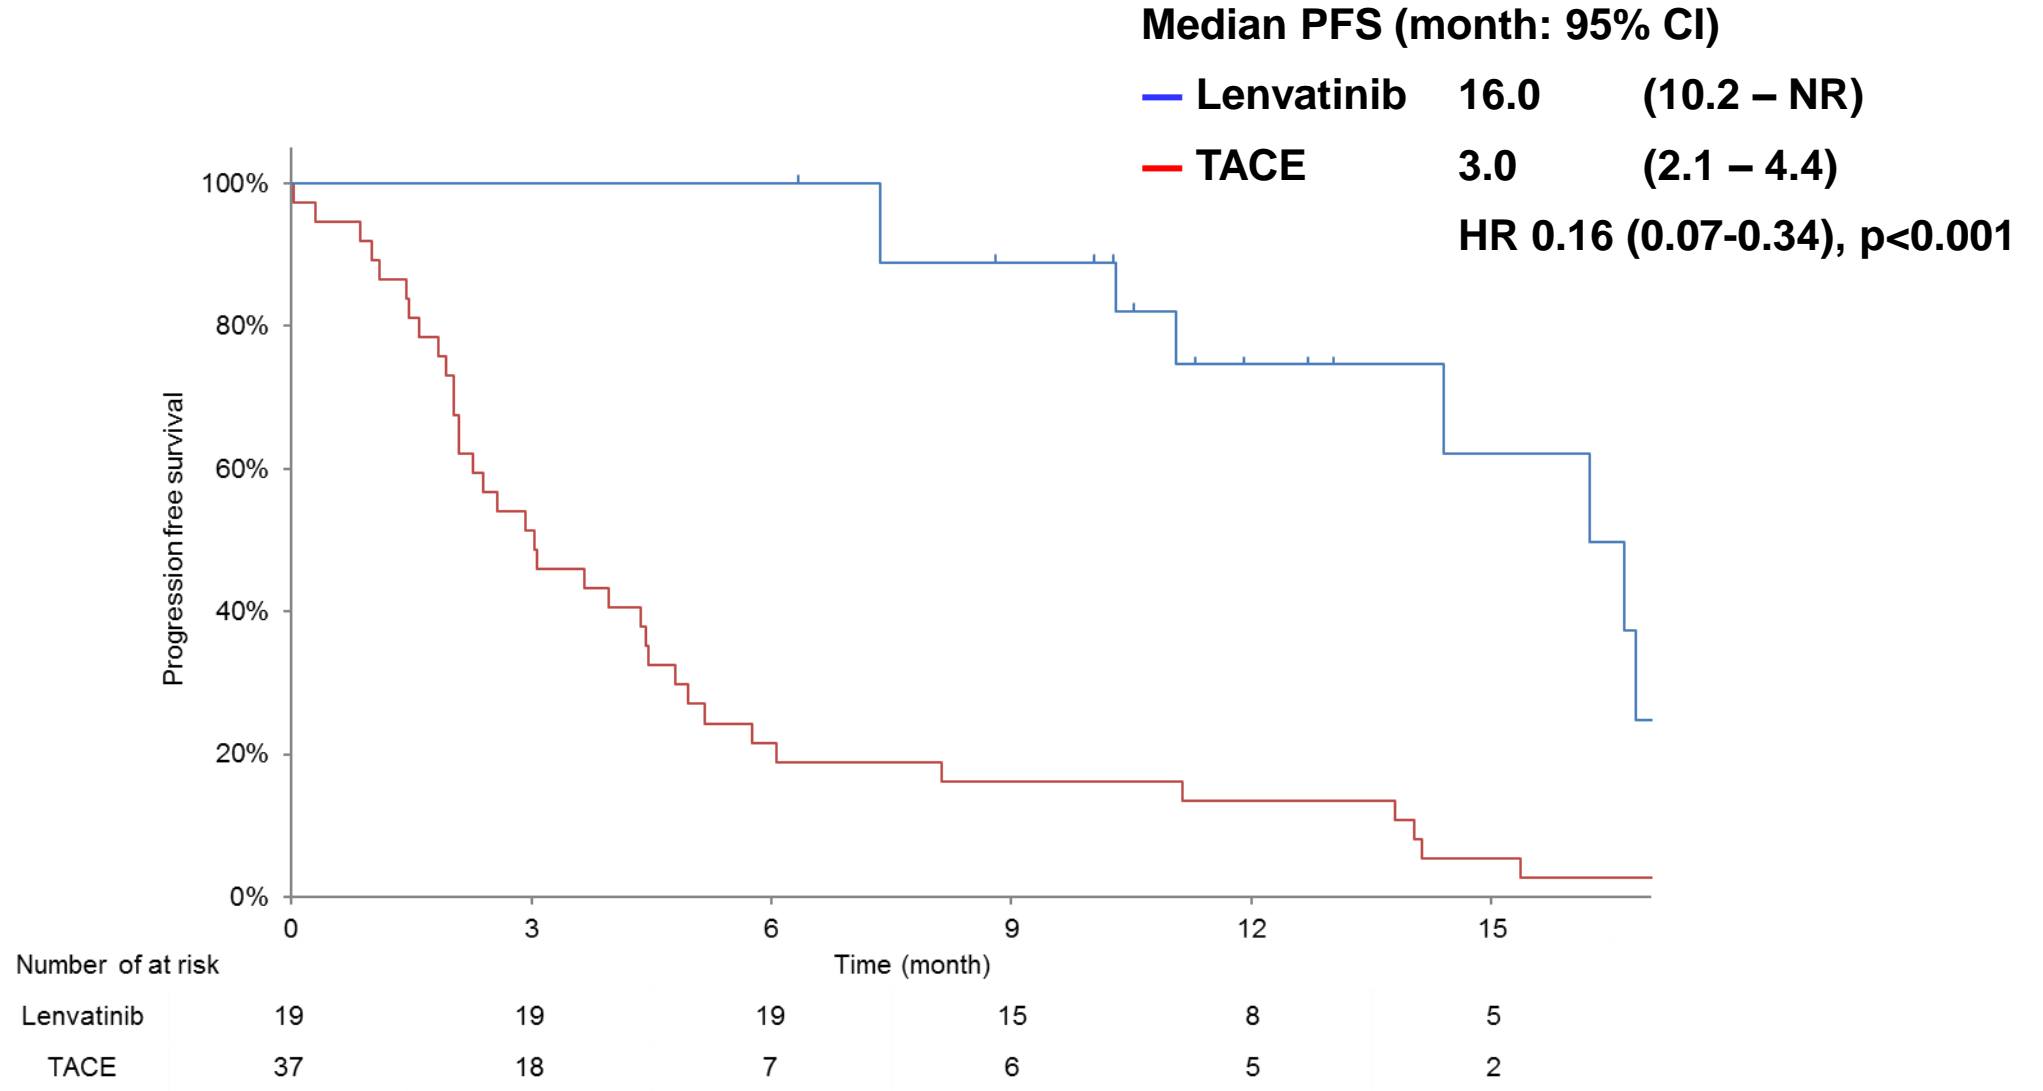

# Supplementary Figure.3 Overall Survival (ALBI grade 1; propensity score matched)

Median OS (month: 95% CI)

— Lenvatinib NR (23.1 - NR)

— TACE 23.1 (15.4 – 38.4)

HR 0.27 (0.08 – 0.89), p=0.021

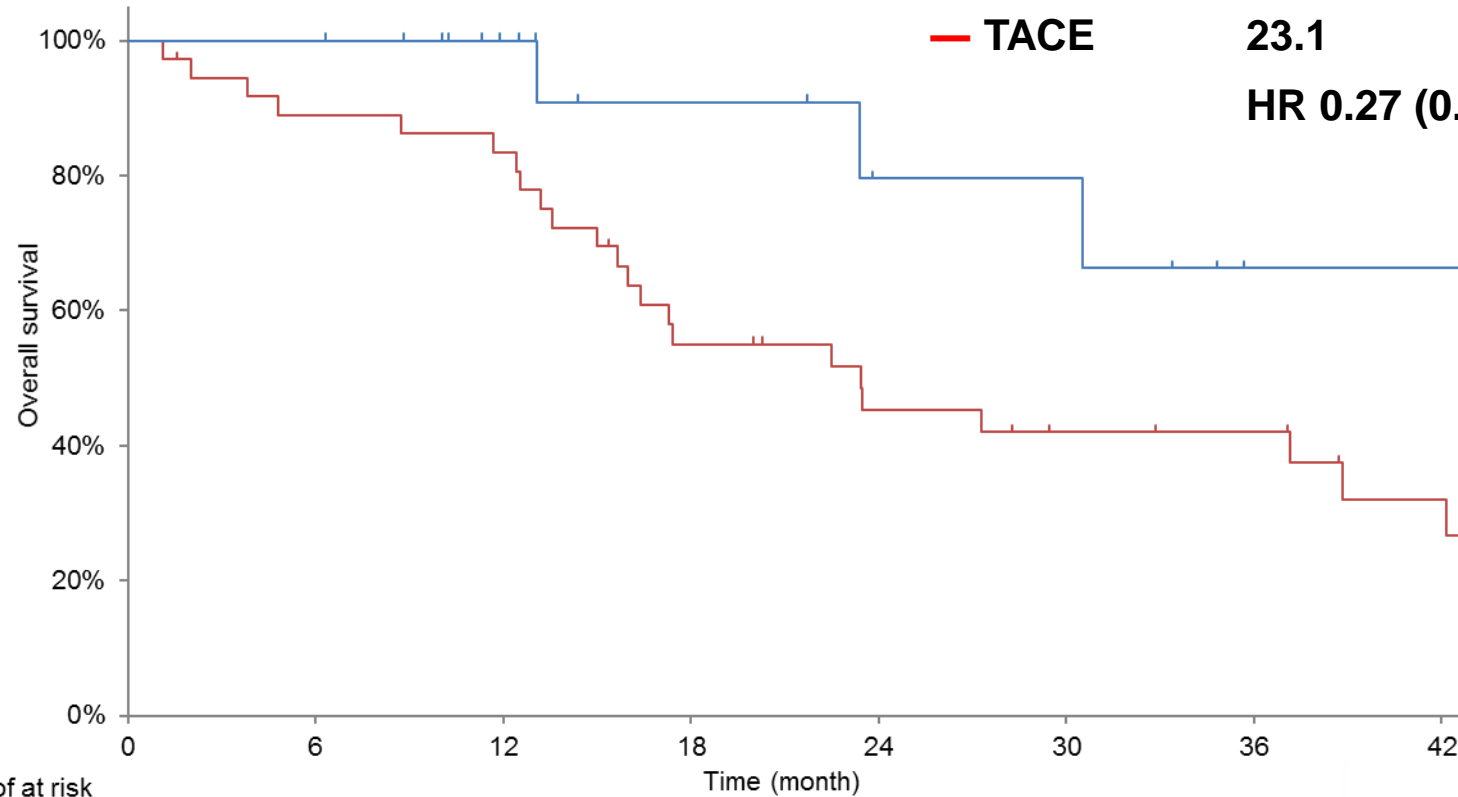

| Number of at risk | 0  | 6  | 12 | 18 | 24 | 30 | 36 | 42 |
|-------------------|----|----|----|----|----|----|----|----|
| Lenvatinib        | 19 | 19 | 13 | 9  | 6  | 6  | 2  | 2  |
| TACE              | 37 | 32 | 30 | 19 | 14 | 11 | 10 | 5  |

**Supplementary Table 1. Objective Response Rate (propensity score matched)  
(ALBI grade 1; propensity score matched)**

|                                         | <b>Lenvatinib<br/>n = 19 (%)</b> | <b>TACE<br/>n = 37 (%)</b> | <b>P-value<br/>Odds ratio (95%CI)</b>    |
|-----------------------------------------|----------------------------------|----------------------------|------------------------------------------|
| <b>ORR</b>                              | <b>14 (73.7%)</b>                | <b>14 (37.8%)</b>          | <b>P&lt;0.05<br/>4.47 (1.19 – 19.51)</b> |
| <b>CBR (CR + PR + SD ≥24w)</b>          | <b>19 (100.0%)</b>               | <b>16 (36.7%)</b>          |                                          |
| <b>DCR</b>                              | <b>19 (100.0%)</b>               | <b>22 (55.0%)</b>          |                                          |
| <b>CR</b>                               | <b>1</b>                         | <b>4</b>                   |                                          |
| <b>PR</b>                               | <b>13</b>                        | <b>10</b>                  |                                          |
| <b>SD</b>                               | <b>5</b>                         | <b>8</b>                   |                                          |
| <b>Durable stable disease (SD ≥24w)</b> | <b>5</b>                         | <b>2</b>                   |                                          |
| <b>PD</b>                               | <b>0</b>                         | <b>13</b>                  |                                          |
| <b>NE</b>                               | <b>0</b>                         | <b>2</b>                   |                                          |

ORR; objective response rate, CBR; clinical benefit rate, DCR; disease control rate, CR; complete response rate, PR; partial response, SD; stable disease, PD; progressive disease, NE; not evaluable
